# Supplementary material for: Patterns and Predictors of Sitting among Women from Disad-Vantaged Neighbourhoods over Time: A 5-Year Prospective Cohort Study
Source: MDPI journal article supplement (doi:10.3390/ijerph18094625), 2021-04-27
Supplement: s1 [file s1]

**Supplementary Table S1.** Comparison of baseline characteristics between participants who completed surveys at three time points (T1, T2 and T3), participants who completed a survey only at T1, and participants who completed surveys at both T1 and T2

| <b>Variables</b>                 | <b>Completed surveys at T1, T2, T3 (n=1560)</b> | <b>Completed survey at T1 only (n=2347)</b> | <b>Completed surveys at T1 and T2 only</b> |
|----------------------------------|-------------------------------------------------|---------------------------------------------|--------------------------------------------|
| Age in years, (mean, SD)         | 36.2 (7.6)                                      | 33.1 (8.3)                                  | 33.7 (8.2)                                 |
| BMI kg/m <sup>2</sup> (mean, SD) | 26.1 (5.8)                                      | 26.0 (6.1)                                  | 26.1 (6.2)                                 |
| Area of residence (N, %)         |                                                 |                                             |                                            |
| Urban                            | 623 (40.2)                                      | 1251 (51.7)                                 | 142 (40.3)                                 |
| Rural                            | 937 (59.8)                                      | 1155 (48.3)                                 | 211 (59.6)                                 |
| General Health (N, %)            |                                                 |                                             |                                            |
| Excellent                        | 180 (12.8)                                      | 173 (7.5)                                   | 27 (7.9)                                   |
| Very good                        | 554 (37.9)                                      | 803 (34.7)                                  | 99 (29.3)                                  |
| Good                             | 599 (36.7)                                      | 968 (41.9)                                  | 155 (45.7)                                 |
| Poor/Fair                        | 177 (12.6)                                      | 369 (15.9)                                  | 58 (17.1)                                  |
| Smoking status (N, %)            |                                                 |                                             |                                            |
| Never smoked                     | 817 (50.4)                                      | 1212 (49.8)                                 | 155 (49.0)                                 |
| Used to smoke                    | 414 (23.4)                                      | 558 (22.9)                                  | 94 (23.4)                                  |
| Smoke occasionally               | 122 (10.1)                                      | 242 (9.9)                                   | 47 (10.3)                                  |
| Smoke regularly                  | 207 (17.1)                                      | 421 (17.4)                                  | 57 (17.3)                                  |
| Level of Education (N, %)        |                                                 |                                             |                                            |
| Low                              | 331 (21.3)                                      | 534 (21.7)                                  | 81 (21.8)                                  |
| Medium                           | 755 (48.6)                                      | 1270 (53.8)                                 | 191 (53.8)                                 |
| High                             | 467 (30.1)                                      | 576 (24.5)                                  | 77 (24.3)                                  |
| Employment status (N, %)         |                                                 |                                             |                                            |
| Working full-time                | 578(37.7)                                       | 919 (39.8)                                  | 116 (33.4)                                 |
| Working part-time                | 501 (32.7)                                      | 628 (26.5)                                  | 116 (33.4)                                 |
| Not working                      | 455 (29.6)                                      | 802 (33.7)                                  | 115 (33.2)                                 |
| Average gross income (N, %)      |                                                 |                                             |                                            |
| No income                        | 112 (7.5)                                       | 164 (0.6)                                   | 31 (8.8)                                   |
| \$1-699 AUD/week                 | 589 (39.0)                                      | 1293 (56.8)                                 | 193 (52.7)                                 |
| \$700-1499 AUD/week              | 616 (41.5)                                      | 454 (19.8)                                  | 69 (19.5)                                  |
| \$1500 AUD or more/week          | 46 (3.1)                                        | 46 (2.0)                                    | 9 (2.0)                                    |
| Don't know/want to answer        | 133 (8.9)                                       | 323 (18.2)                                  | 32 (9.0)                                   |
| Marital Status (N, %)            |                                                 |                                             |                                            |
| Married                          | 1128 (72.3)                                     | 1460 (60.4)                                 | 241 (68.5)                                 |
| Separated                        | 117 (7.8)                                       | 216 (8.8)                                   | 33 (9.4)                                   |
| Never Married                    | 296 (19.8)                                      | 735 (30.7)                                  | 78 (22.2)                                  |
| Number of children (N, %)        |                                                 |                                             |                                            |
| None                             | 540 (36.5)                                      | 1006 (42.5)                                 | 110 (31.5)                                 |
| One                              | 264 (17.8)                                      | 431 (18.1)                                  | 78 (22.4)                                  |
| Two                              | 394 (26.6)                                      | 572 (24.2)                                  | 98 (28.1)                                  |
| Three or more                    | 281 (19.0)                                      | 364 (15.2)                                  | 63 (18.0)                                  |

Abbreviations: BMI- body mass index, SD- standard deviation, N (%) - number(percentage), T1=2007-08, T2=2010-11, T3=2012-13

**Supplementary Table S2.** Change in sitting over five years by sociodemographic and health characteristics: Complete case sensitivity analysis

|                          |                         | Unadjusted model                 |              |         | Adjusted model                   |              |         |
|--------------------------|-------------------------|----------------------------------|--------------|---------|----------------------------------|--------------|---------|
| Variables                |                         | $\beta$ -coefficient<br>(95% CI) |              | p-value | $\beta$ -coefficient<br>(95% CI) |              | p-value |
| Age category<br>(years)  | Baseline difference     | Ref                              |              |         | Ref                              |              |         |
|                          | 18-24years              | Ref                              |              |         | Ref                              |              |         |
|                          | 25-34years              | -1.3                             | (-3.4, 0.8)  | 0.219   | -0.0                             | (-2.2, 2.1)  | 0.988   |
|                          | 35-45years              | -4.5                             | (-6.2, -2.3) | <0.001  | -1.1                             | (-3.2, -1.0) | 0.311   |
|                          | Average change per year | -0.4                             | (-1.0, 0.2)  | 0.224   | -0.2                             | (-0.8, 0.4)  | 0.528   |
|                          | 18-24years              |                                  |              |         |                                  |              |         |
|                          | 25-34years              | -0.2                             | (-0.9, 0.5)  | 0.568   | -0.4                             | (-1.2, 0.3)  | 0.270   |
| BMI (kg/m <sup>2</sup> ) | 35-45years              | 0.6                              | (-0.1, 1.2)  | 0.105   | 0.4                              | (-0.3, 1.1)  | 0.320   |
|                          | Baseline difference     | Ref                              |              |         | Ref                              |              |         |
|                          | Normal                  | Ref                              |              |         | Ref                              |              |         |
|                          | Overweight (26-30)      | 1.8                              | (0.1, 3.5)   | 0.038   | 2.0                              | (0.3, 3.7)   | 0.020   |
|                          | Obese (>30)             | 3.4                              | (1.6, 5.2)   | <0.001  | 3.7                              | (1.8, 5.5)   | <0.001  |
|                          | Average change per year | 0.0                              | (-0.3, 0.3)  | 0.921   | 0.1                              | (-0.2, 0.4)  | 0.528   |
|                          | Normal                  |                                  |              |         |                                  |              |         |
| Area of<br>Residence     | Overweight              | -0.3                             | (-0.8, 0.3)  | 0.391   | -0.3                             | (-0.8, 0.2)  | 0.243   |
|                          | Obese (>30)             | -0.4                             | (-0.9, 0.2)  | 0.174   | -0.5                             | (-1.0, 0.1)  | 0.126   |
|                          | Baseline difference     | Ref                              |              |         | Ref                              |              |         |
|                          | Urban                   | Ref                              |              |         | Ref                              |              |         |
|                          | Rural                   | -5.1                             | (-6.4, -3.7) | <0.001  | -3.7                             | (-5.1, -2.2) | <0.001  |
|                          | Average change per year | -0.2                             | (-0.5, 0.1)  | 0.167   | -0.3                             | (-0.6, 0.1)  | 0.09    |
|                          | Urban                   |                                  |              |         |                                  |              |         |
| General Health           | Rural                   | 0.2                              | (-0.2, 0.7)  | 0.315   | 0.3                              | (-0.1, 0.8)  | 0.124   |
|                          | Baseline difference     | Ref                              |              |         | Ref                              |              |         |
|                          | Excellent               | Ref                              |              |         | Ref                              |              |         |
|                          | Very Good               | 1.7                              | (-0.7, 4.3)  | 0.168   | 1.4                              | (-1.7, 3.3)  | 0.274   |
|                          | Good                    | 2.8                              | (0.3, 5.3)   | 0.027   | 1.9                              | (-1.4, 3.5)  | 0.139   |

|                   |                         |      |               |        |      |              |        |
|-------------------|-------------------------|------|---------------|--------|------|--------------|--------|
| Smoking status    | Poor/fair               | 4.5  | (1.6, 7.4)    | 0.002  | 2.2  | (-1.4, 4.5)  | 0.155  |
|                   | Average change per year | -0.1 | (-0.8, 0.5)   | 0.676  | -0.0 | (-0.5, 0.7)  | 0.906  |
|                   | Excellent               |      |               |        |      |              |        |
|                   | Very Good               | 0.1  | (-0.7, 0.8)   | 0.835  | 0.0  | (-0.7, 0.8)  | 0.917  |
|                   | Good                    | -0.2 | (-0.9, 0.5)   | 0.587  | -0.4 | (-1.1, 0.3)  | 0.306  |
|                   | Poor/fair               | 0.4  | (-0.5, 1.3)   | 0.361  | 0.1  | (-0.8, 1.1)  | 0.743  |
|                   | Baseline difference     |      |               |        |      |              |        |
|                   | No smoking              | Ref  |               |        | Ref  |              |        |
|                   | Used to smoke           | 0.0  | (-1.6, 1.7)   | 0.956  | 0.9  | (-0.8, 2.5)  | 0.215  |
|                   | Smoke Occasionally      | 0.1  | (-2.3, 2.5)   | 0.958  | -0.4 | (-2.8, 2.2)  | 0.775  |
|                   | Smoke regularly         | 1.1  | (-0.8, 3.1)   | 0.256  | 1.6  | (-0.4, 3.7)  | 0.121  |
|                   | Average change per year | -0.1 | (-0.4, 0.2)   | 0.410  | -0.0 | (-0.3, 0.3)  | 0.906  |
|                   | No smoking              |      |               |        |      |              |        |
|                   | Used to smoke           | 0.0  | (-0.5, 0.5)   | 0.918  | -0.0 | (-0.5, 0.5)  | 0.982  |
|                   | Smoke Occasionally      | 0.3  | (-0.5, 1.1)   | 0.407  | 0.2  | (-0.6, 1.1)  | 0.682  |
|                   | Smoke regularly         | -0.5 | (-1.1, 0.2)   | 0.170  | -0.6 | (-1.3, 0.1)  | 0.096  |
| Education status  | Baseline difference     |      |               |        |      |              |        |
|                   | Low                     | Ref  |               |        | Ref  |              |        |
|                   | Medium                  | 2.0  | (0.2, 3.8)    | 0.025  | -0.1 | (-1.0, 1.7)  | 0.935  |
|                   | High                    | 2.4  | (0.4, 4.3)    | 0.017  | -0.4 | (-2.5, 1.7)  | 0.698  |
|                   | Average change per year | 0.0  | (-0.4, 0.5)   | 0.877  | -0.1 | (-0.6, 0.4)  | 0.756  |
|                   | Low                     |      |               |        |      |              |        |
|                   | Medium                  | -0.3 | (-0.9, 0.2)   | 0.271  | -0.9 | (-0.7, 0.5)  | 0.767  |
| Employment status | High                    | -0.1 | (-0.7, 0.5)   | 0.743  | 0.1  | (-0.5, 0.8)  | 0.633  |
|                   | Baseline difference     |      |               |        |      |              |        |
|                   | Full time               | Ref  |               |        | Ref  |              |        |
|                   | Working part-time       | -6.4 | (-8.1, -4.8)  | <0.001 | -5.1 | (-6.7, -3.4) | <0.001 |
|                   | Not working             | -8.5 | (-10.1, -6.8) | <0.001 | -7.6 | (-9.2, -6.0) | <0.001 |
|                   | Average change per year | -0.4 | (-0.8, -0.1)  | 0.019  | -0.3 | (-0.7, 0.0)  | 0.051  |
|                   | Full-time               |      |               |        |      |              |        |
|                   | Working part-time       | 0.3  | (-0.1, 0.9)   | 0.077  | 0.4  | (-0.0, 1.0)  | 0.146  |
|                   | Not working             | 0.5  | (-0.0, 1.0)   | 0.053  | 0.5  | (0.0, 1.0)   | 0.049  |

|                      |                            |       |               |        |      |              |        |
|----------------------|----------------------------|-------|---------------|--------|------|--------------|--------|
| Average gross income | Baseline difference        |       |               |        |      |              |        |
|                      | Nil                        | Ref   |               |        | Ref  |              |        |
|                      | \$1-699 AUD                | 3.6   | (0.5, 5.3)    | 0.007  | 0.8  | (-1.6, 3.3)  | 0.503  |
|                      | \$700-1499 AUD             | 9.2   | (6.7, 12.0)   | <0.001 | 4.6  | (1.7, 7.6)   | 0.002  |
|                      | \$1500 AUD or more/week    | 17.2  | (12.3, 22.1)  | <0.001 | 14.4 | (9.2, 19.5)  | <0.001 |
|                      | Don't know/want to answer  | 3.9   | (0.2, 6.2)    | 0.016  | 0.5  | (-2.5, 3.5)  | 0.736  |
|                      | Average change per year    | 0.0   | (-0.9, 0.4)   | 0.989  | 0.0  | (-0.7, 0.7)  | 0.960  |
|                      | Nil                        |       |               |        |      |              |        |
|                      | \$1-699 AUD                | 0.1   | (-0.4, 1.1)   | 0.982  | 0.1  | (-0.6, 0.8)  | 0.771  |
|                      | \$700-1499 AUD             | -0.4  | (-1.0, 0.6)   | 0.351  | -0.4 | (-1.2, 0.3)  | 0.267  |
| Marital status       | \$1500 AUD or more/week    | -1.5  | (-2.9, 0.0)   | 0.061  | -1.2 | (-2.8, 0.3)  | 0.113  |
|                      | Don't know/want to answer  | -0.8  | (-1.4, 0.6)   | 0.151  | -0.7 | (-1.7, 0.3)  | 0.186  |
|                      | Baseline difference        |       |               |        |      |              |        |
|                      | Married                    | Ref   |               |        | Ref  |              |        |
|                      | Separated/Divorced/Widowed | 0.1   | (-2.3, 2.6)   | 0.919  | -0.3 | (-2.7, 2.1)  | 0.800  |
|                      | Never married              | 7.4   | (5.8, 9.0)    | <0.001 | 4.9  | (3.1, 6.7)   | <0.001 |
|                      | Average change per year    | -0.1  | (-0.4, 0.1)   | 0.384  | -0.1 | (-0.3, 0.2)  | 0.486  |
|                      | Married                    |       |               |        |      |              |        |
|                      | Separated/Divorced/Widowed | 0.4   | (-0.4, 1.2)   | 0.291  | 0.4  | (-0.4, 1.2)  | 0.338  |
|                      | Never married              | -0.1  | (-0.6, 0.4)   | 0.694  | -0.2 | (-0.8, 0.3)  | 0.400  |
| Number of children   | Baseline difference        |       |               |        |      |              |        |
|                      | No children                | Ref   |               |        | Ref  |              |        |
|                      | One                        | -6.8  | (-8.7, -4.9)  | <0.001 | -4.0 | (-6.0, -2.0) | <0.001 |
|                      | Two                        | -9.2  | (-10.9, -7.5) | <0.001 | -5.8 | (-7.7, -3.9) | <0.001 |
|                      | Three or more              | -11.9 | (-13.8, -9.9) | <0.001 | -7.7 | (-9.8, -5.5) | <0.001 |
|                      | Average change per year    | -0.8  | (-1.1, -0.4)  | <0.001 | -0.7 | (-1.1, -0.4) | 0.001  |
|                      | No children                |       |               |        |      |              |        |
|                      | One                        | 0.5   | (-0.1, 1.1)   | 0.103  | 0.6  | (-0.1, 1.1)  | 0.091  |
|                      | Two                        | 0.9   | (0.4, 1.5)    | 0.001  | 0.9  | (0.4, 1.5)   | <0.001 |
|                      | Three or more              | 1.5   | (0.9, 2.2)    | <0.001 | 1.5  | (0.9, 2.1)   | <0.001 |

Abbreviations: Ref- reference, BMI- body mass index, CI- confidence interval.

Each model adjusted:

Age category for BMI, area of residence and number of children.

BMI category for age, area of residence, health status, education, employment, marital status and number of kids.

Area of residence for BMI, marital status and number of children.

Health status for age, BMI, area of residence, education, employment, marital status and number of children.

Smoking status for age, BMI, area of residence, education, health status, marital status and number of children.

Employment status for area of residence and marital status.

Education status for BMI, area of residence, employment status, health status, marital status and number of children.

Income status for age, BMI, health status, marital status and number of children.

Marital status for age, area of residence and number of children.

Number of children for area of residence, employment status and marital status

**Supplementary Table S3.** Change in sitting over five years by sociodemographic and health characteristics: Sensitivity analysis truncating high/implausible sitting values

|                          |                         | Unadjusted model                 |              |         | Adjusted model                   |              |         |
|--------------------------|-------------------------|----------------------------------|--------------|---------|----------------------------------|--------------|---------|
| Variables                |                         | $\beta$ -coefficient<br>(95% CI) |              | p-value | $\beta$ -coefficient<br>(95% CI) |              | p-value |
| Age category<br>(years)  | Baseline difference     |                                  |              |         |                                  |              |         |
|                          | 18-24years              | Ref                              |              |         | Ref                              |              |         |
|                          | 25-34years              | -1.6                             | (-3.7, 0.5)  | 0.142   | 0.1                              | (-2.2, 2.2)  | 0.979   |
|                          | 35-45years              | -5.0                             | (-6.9, -3.1) | <0.001  | -1.2                             | (-3.3, 1.0)  | 0.296   |
|                          | Average change per year | -0.7                             | (-1.3, -0.1) | 0.026   | -0.6                             | (-1.2, 0.0)  | 0.037   |
|                          | 18-24years              |                                  |              |         |                                  |              |         |
|                          | 25-34years              | -0.2                             | (-0.9, 0.5)  | 0.547   | -0.1                             | (-0.9, 0.6)  | 0.680   |
| BMI (kg/m <sup>2</sup> ) | 35-45years              | 0.7                              | (0.0, 1.4)   | 0.038   | 0.7                              | (0.0, 1.3)   | 0.047   |
|                          | Baseline difference     |                                  |              |         |                                  |              |         |
|                          | Normal                  | Ref                              |              |         | Ref                              |              |         |
|                          | Overweight (26-30)      | 2.0                              | (0.4, 3.6)   | 0.014   | 2.4                              | (0.7, 4.1)   | 0.002   |
|                          | Obese (>30)             | 2.9                              | (1.2, 4.6)   | 0.004   | 2.8                              | (1.0, 4.7)   | 0.005   |
|                          | Average change per year | -0.2                             | (-0.5, 0.1)  | 0.158   | -0.1                             | (-0.4, 0.2)  | 0.443   |
|                          | Normal                  |                                  |              |         |                                  |              |         |
| Area of<br>Residence     | Overweight              | -0.4                             | (-0.9, 0.1)  | 0.95    | -0.5                             | (-0.9, 0.3)  | 0.069   |
|                          | Obese (>30)             | -0.2                             | (-0.7, 0.4)  | 0.558   | -0.2                             | (-0.7, 0.4)  | 0.500   |
|                          | Baseline difference     |                                  |              |         |                                  |              |         |
|                          | Urban                   | Ref                              |              |         | Ref                              |              |         |
|                          | Rural                   | -5.8                             | (-7.1, -4.4) | 0.001   | -3.9                             | (-5.3, -2.6) | <0.001  |
|                          | Average change per year | -0.6                             | (-0.9, -0.2) | <0.001  | -0.5                             | (-0.9, -0.2) | 0.001   |
|                          | Urban                   |                                  |              |         |                                  |              |         |
| General Health           | Rural                   | 0.5                              | (0.0, 0.9)   | 0.030   | 0.5                              | (0.1, 0.9)   | 0.026   |
|                          | Baseline difference     |                                  |              |         |                                  |              |         |
|                          | Excellent               | Ref                              |              |         | Ref                              |              |         |
|                          | Very Good               | 0.6                              | (-1.9, 3.2)  | 0.643   | -0.3                             | (-2.8, 2.2)  | 0.797   |

|                   |                         |       |               |        |      |              |        |
|-------------------|-------------------------|-------|---------------|--------|------|--------------|--------|
|                   | Good                    | 1.7   | (-0.8, 4.2)   | 0.193  | 0.1  | (-2.4, 2.6)  | 0.734  |
|                   | Poor/fair               | 4.2   | (1.2, 7.1)    | 0.006  | 1.7  | (-1.2, 4.7)  | 0.247  |
|                   | Average change per year | -0.5  | (-1.1, 0.1)   | 0.118  | -0.4 | (-1.0, 0.3)  | 0.264  |
|                   | Excellent               |       |               |        |      |              |        |
|                   | Very Good               | 0.3   | (-0.5, 0.9)   | 0.540  | 0.2  | (-0.5, 0.9)  | 0.604  |
|                   | Good                    | 0.1   | (-0.7, 0.7)   | 0.948  | 0.1  | (-0.8, 0.7)  | 0.927  |
|                   | Poor/fair               | 0.5   | (-0.3, 1.4)   | 0.217  | 0.4  | (-0.5, 1.3)  | 0.359  |
| Smoking status    | Baseline difference     |       |               |        |      |              |        |
|                   | No smoking              | Ref   |               |        | Ref  |              |        |
|                   | Used to smoke           | -1.1  | (-2.8, 0.6)   | 0.207  | -0.0 | (-1.7, 1.6)  | 0.406  |
|                   | Smoke Occasionally      | 0.2   | (-2.3, 2.7)   | 0.872  | -0.8 | (-3.2, 1.6)  | 0.497  |
|                   | Smoke regularly         | -0.1  | (-2.1, 1.9)   | 0.914  | -0.2 | (-2.1, 1.8)  | 0.568  |
|                   | Average change per year | -0.5  | (-0.7, -0.1)  | 0.003  | 0.3  | (-0.6, 0.0)  | 0.032  |
|                   | No smoking              |       |               |        |      |              |        |
|                   | Used to smoke           | 0.3   | (-0.2, 0.8)   | 0.294  | 0.2  | (-0.3, 0.7)  | 0.406  |
|                   | Smoke Occasionally      | 0.3   | (-0.4, 1.1)   | 0.394  | 0.3  | (-0.5, 1.1)  | 0.407  |
|                   | Smoke regularly         | -0.1  | (-0.7, 0.5)   | 0.773  | -0.2 | (-0.8, 0.4)  | 0.457  |
| Education status  | Baseline difference     |       |               |        |      |              |        |
|                   | Low                     | Ref   |               |        | Ref  |              |        |
|                   | Medium                  | 2.3   | (0.5, 4.1)    | 0.009  | 0.1  | (-1.7, 1.9)  | 0.795  |
|                   | High                    | 4.0   | (2.0, 6.1)    | <0.001 | 1.1  | (-0.9, 3.2)  | 0.345  |
|                   | Average change per year | 0.1   | (-0.4, 0.5)   | 0.873  | -0.1 | (-0.5, 0.4)  | 0.795  |
|                   | Low                     |       |               |        |      |              |        |
|                   | Medium                  | -0.5  | (-0.9, 0.1)   | 0.097  | -0.3 | (-0.8, 0.3)  | 0.349  |
|                   | High                    | -0.6  | (-1.2, -0.1)  | 0.038  | -0.4 | (-1.0, 0.2)  | 0.194  |
| Employment status | Baseline difference     |       |               |        |      |              |        |
|                   | Full time               | Ref   |               |        | Ref  |              |        |
|                   | Working part-time       | -9.4  | (-11.1, -7.7) | <0.001 | -6.8 | (-8.5, -5.1) | <0.001 |
|                   | Not working             | -10.5 | (-12.2, -8.9) | <0.001 | -7.8 | (-9.6, -6.1) | <0.001 |
|                   | Average change per year | -1.1  | (-1.4, -0.7)  | <0.001 | -0.9 | (-1.3, -0.6) | <0.001 |
|                   | Full-time               |       |               |        |      |              |        |
|                   | Working part-time       | 1.1   | (0.6, 1.6)    | <0.001 | 1.1  | (0.6, 1.6)   | <0.001 |

|                      |                            |       |                |        |      |               |        |
|----------------------|----------------------------|-------|----------------|--------|------|---------------|--------|
| Average gross income | Not working                | 1.2   | (0.6, 1.7)     | <0.001 | 1.2  | (0.7, 1.7)    | <0.001 |
|                      | Baseline difference        |       |                |        |      |               |        |
|                      | Nil                        | Ref   |                |        | Ref  |               |        |
|                      | \$1-699 AUD                | 2.8   | (0.1, 5.6)     | 0.043  | 0.6  | (-2.1, 3.4)   | 0.643  |
|                      | \$700-1499 AUD             | 11.9  | (8.9, 14.3)    | <0.001 | 6.7  | (3.6, 9.9)    | <0.001 |
|                      | \$1500 AUD or more/week    |       |                |        |      |               |        |
|                      | Don't know/want to answer  | 3.8   | (0.5, 7.1)     | 0.023  | 0.9  | (-2.3, 4.3)   | 0.557  |
|                      | Average change per year    | -0.4  | (-1.1, 0.3)    | 0.287  | -0.1 | (-0.7, 0.6)   | 0.897  |
|                      | Nil                        |       |                |        |      |               |        |
|                      | \$1-699 AUD                | 0.3   | (-0.4, 1.0)    | 0.413  | 0.1  | (-0.6, 0.8)   | 0.774  |
| Marital status       | \$700-1499 AUD             | -0.8  | (-1.6, -0.1)   | 0.042  | -1.0 | (-1.8, -0.3)  | 0.009  |
|                      | \$1500 AUD or more/week    | -1.7  | (-3.9, 0.1)    | 0.331  | -1.3 | (-2.9, 0.3)   | 0.213  |
|                      | Don't know/want to answer  | -0.6  | (-1.6, 0.3)    | 0.199  | -0.9 | (-1.9, 0.1)   | 0.057  |
|                      | Baseline difference        |       |                |        |      |               |        |
|                      | Married                    | Ref   |                |        | Ref  |               |        |
|                      | Separated/Divorced/Widowed | -0.8  | (-3.3, 1.7)    | 0.522  | -1.4 | (-3.9, 1.0)   | 0.258  |
|                      | Never married              | 7.5   | (5.9, 9.1)     | <0.001 | 4.3  | (2.5, 6.1)    | <0.001 |
|                      | Average change per year    | -0.3  | (-0.6, -0.1)   | 0.008  | -0.3 | (-0.5, -0.1)  | 0.025  |
|                      | Married                    |       |                |        |      |               |        |
|                      | Separated/Divorced/Widowed | 0.7   | (-0.1, 1.5)    | 0.068  | 0.6  | (-0.4, 1.4)   | 0.108  |
| Number of children   | Never married              | -0.1  | (-0.6, 0.4)    | 0.734  | -0.2 | (-0.7, 0.3)   | 0.446  |
|                      | Baseline difference        |       |                |        |      |               |        |
|                      | No children                | Ref   |                |        | Ref  |               |        |
|                      | One                        | -8.6  | (-10.5, -6.6)  | <0.001 | -5.7 | (-7.7, -3.6)  | <0.001 |
|                      | Two                        | -10.6 | (-12.3, -8.8)  | <0.001 | -6.9 | (-8.8, -4.9)  | <0.001 |
|                      | Three or more              | -13.6 | (-15.6, -11.6) | <0.001 | -9.1 | (-11.4, -6.9) | <0.001 |
|                      | Average change per year    | -1.1  | (-1.5, -0.8)   | <0.001 | -1.1 | (-1.4, -0.7)  | <0.001 |
|                      | No children                |       |                |        |      |               |        |
|                      | One                        | 0.9   | (0.3, 1.5)     | 0.005  | 0.9  | (0.3, 1.5)    | 0.003  |
|                      | Two                        | 1.2   | (0.6, 1.7)     | <0.001 | 1.2  | (0.7, 1.7)    | <0.001 |
|                      | Three or more              | 1.8   | (1.2, 2.4)     | <0.001 | 1.8  | (1.2, 2.4)    | <0.001 |

Abbreviations: Ref- reference, BMI- body mass index, CI- confidence interval.



Each model adjusted:

Age category for BMI, area of residence and number of children.

BMI category for age, area of residence, health status, education, employment, marital status and number of kids.

Area of residence for BMI, marital status and number of children.

Health status for age, BMI, area of residence, education, employment, marital status and number of children.

Smoking status for age, BMI, area of residence, education, health status, marital status and number of children.

Employment status for area of residence and marital status.

Education status for BMI, area of residence, employment status, health status, marital status and number of children.

Income status for age, BMI, health status, marital status and number of children.

Marital status for age, area of residence and number of children.

Number of children for area of residence, employment status and marital status
